# Supplementary material for: Chemerin is secreted by the chicken oviduct, accumulates in egg albumen and could promote embryo development
Source: PubMed Central journal article supplement (PMC9148909; doi:10.1038/s41598-022-12961-4), 2022-05-29

**Figure 1A**

Blot: Chemerin

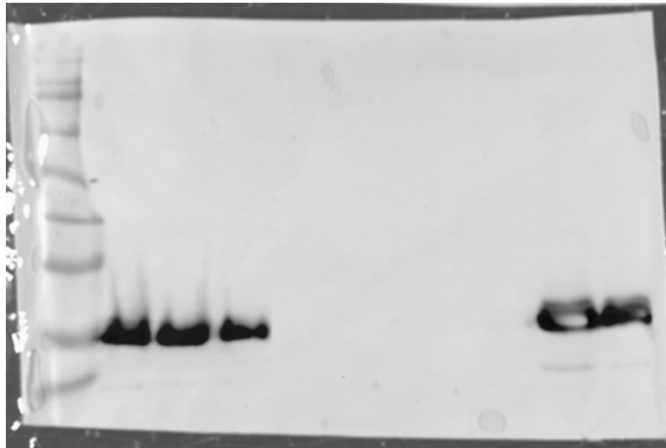

Ponceau

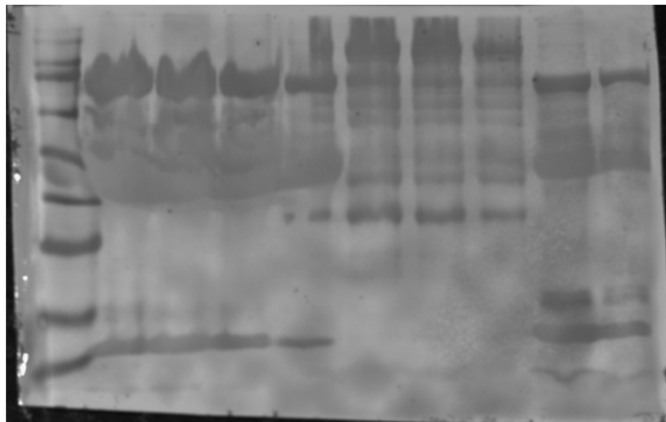

**Figure 1B**

Standard molecular Weight:

Ref: BlueStar Prestained Protein Marker11

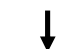

180  
130  
100  
75  
63  
48  
35  
28  
17  
10

Blot: Chemerin

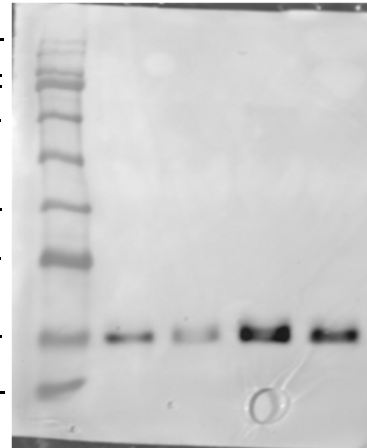

Ponceau

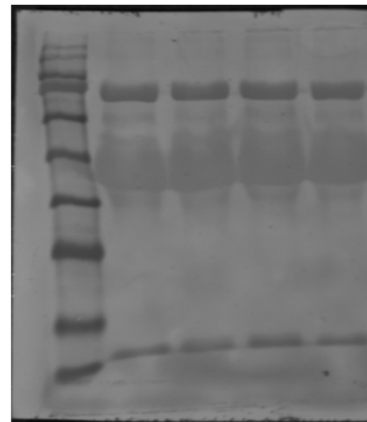

**Figure 1C**

Standard molecular Weight:

Ref: SDS7B2 (Sigma Aldrich)

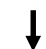

180  
116  
90  
58  
49  
37  
27

Blot: Chemerin

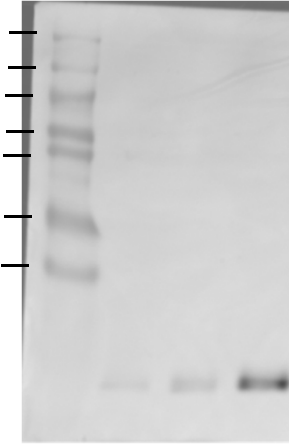

Ponceau

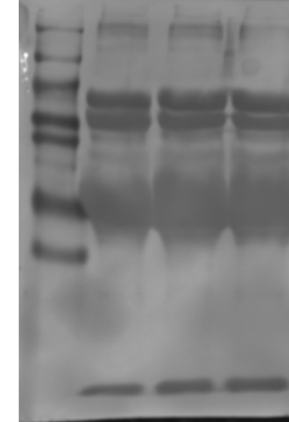

**Figure 2F**

Blot: Chemerin

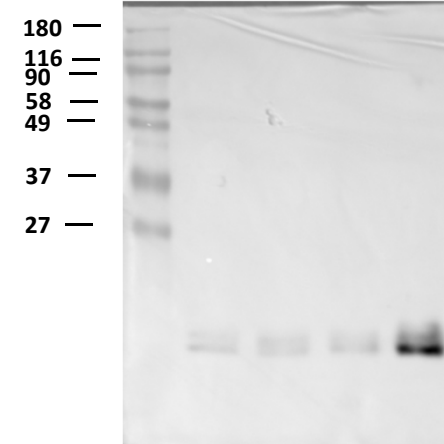

Blot: Vinculin

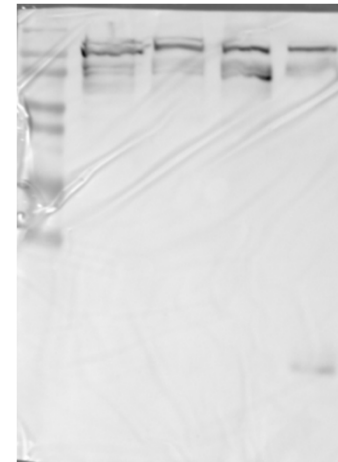

**Figure 2C**

Blot: Chemerin

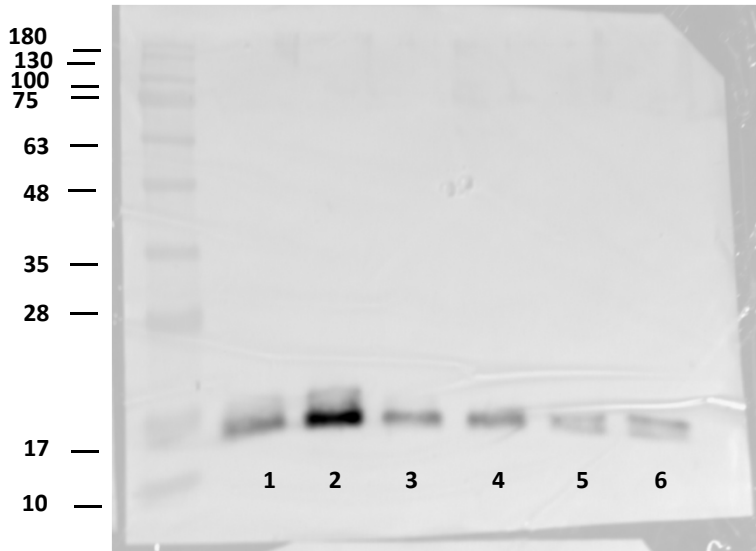

1: Infundibulum; 2: Magnum; 3: Utero-vaginal junction; 4: Isthmus; 5: Shell gland; 6: Vagina

In the figure 2C in our manuscript we removed the Utero-vaginal junction

Blot: Vinculin

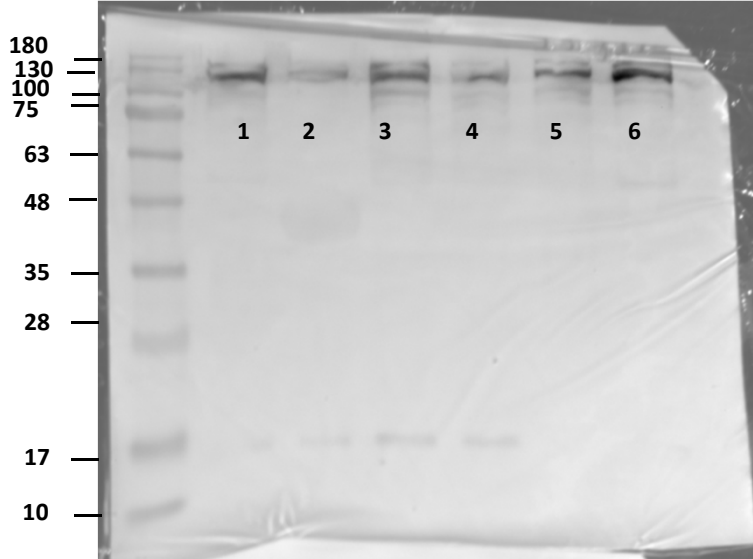

1: Infundibulum; 2: Magnum; 3: Utero-vaginal junction; 4: Isthmus; 5: Shell gland; 6: Vagina

In the figure 2C in our manuscript we removed the Utero-vaginal junction

**Figure 3A**

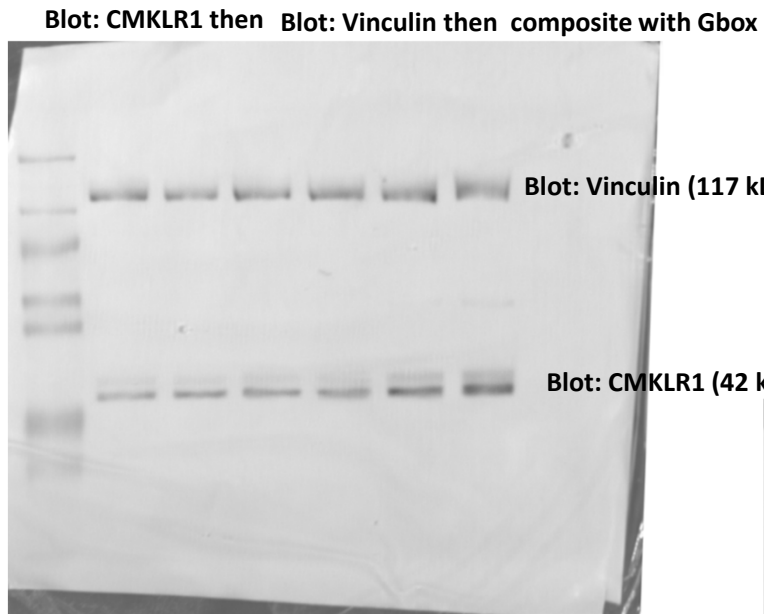

**Figure 3B**

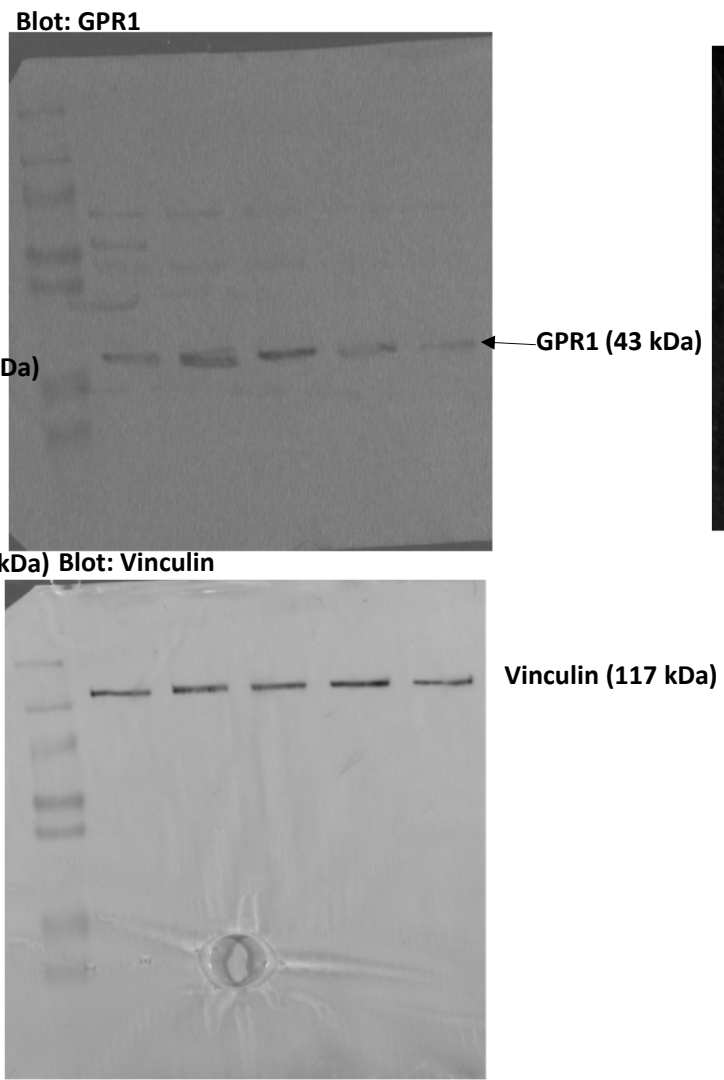

**Figure 3C**

This blot has been probed with another antibody (Akt) justifying a band around 56 kDa

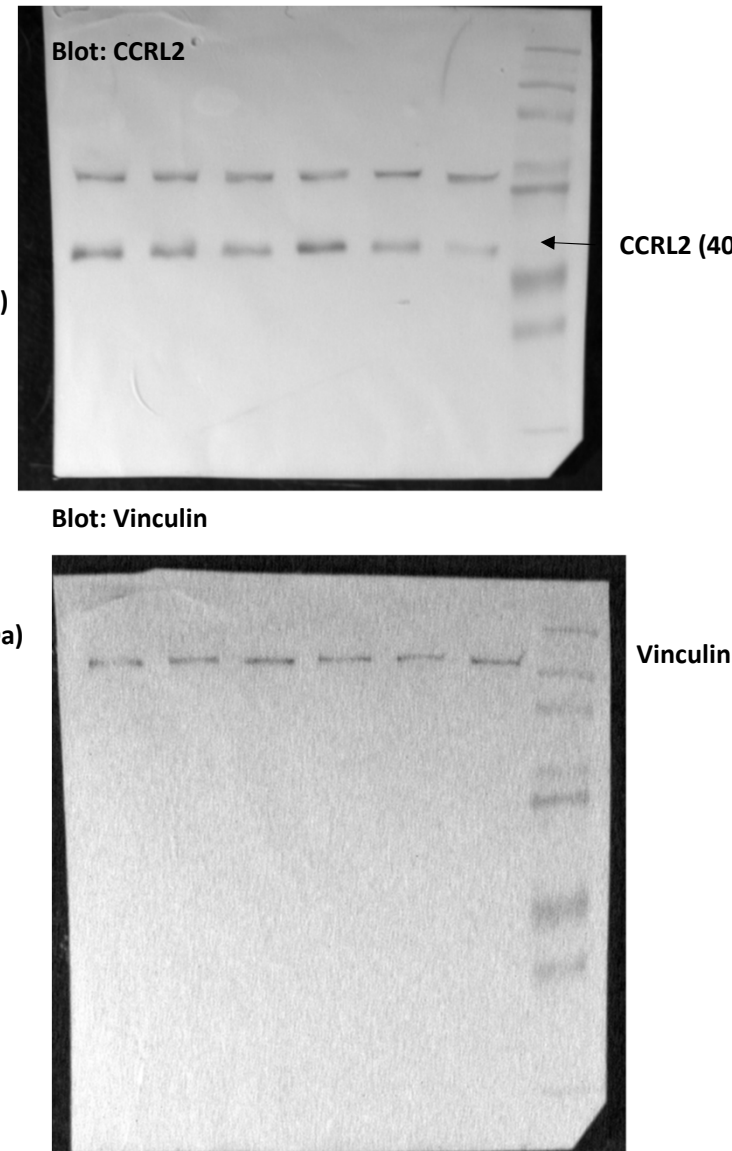

**Figure 4A**

Blot: Chemerin

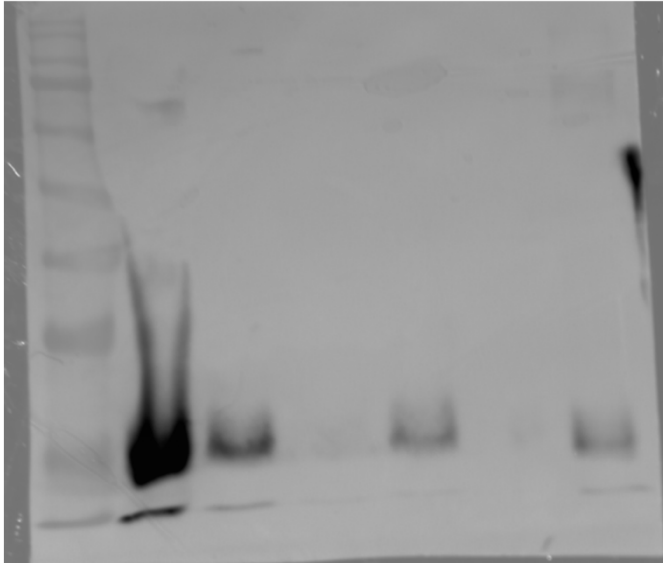

Blot: Chemerin (blot cropped)

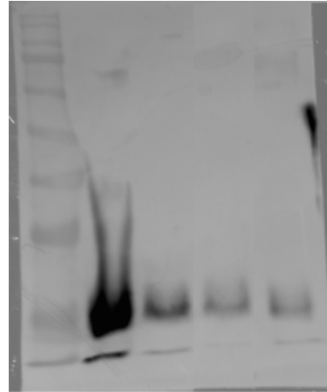

**Figure 4C**

Blot: Chemerin

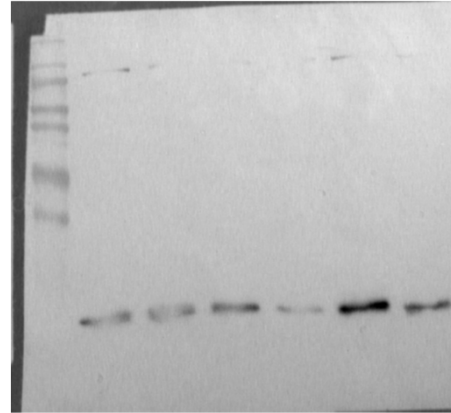

**Figure 4D**

Blot: CMKLR1

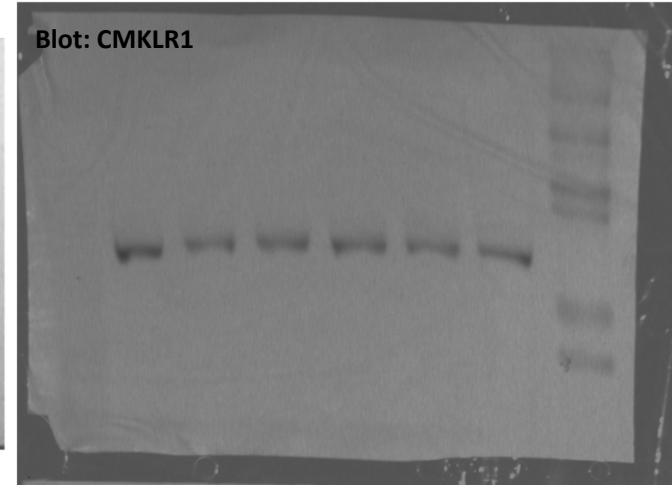

Ponceau

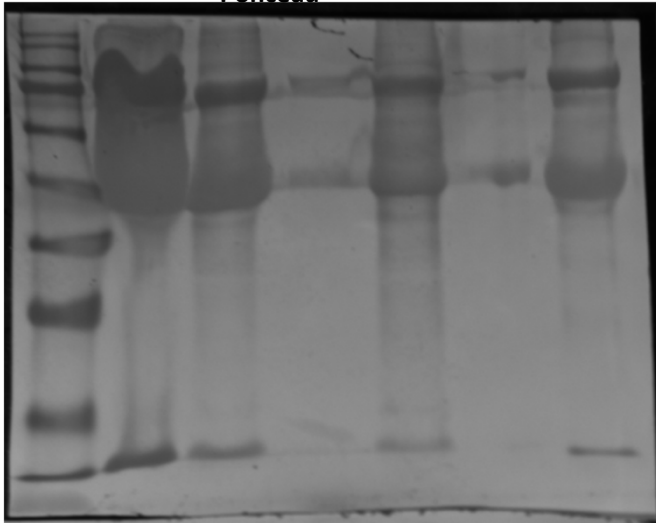

Ponceau cropped

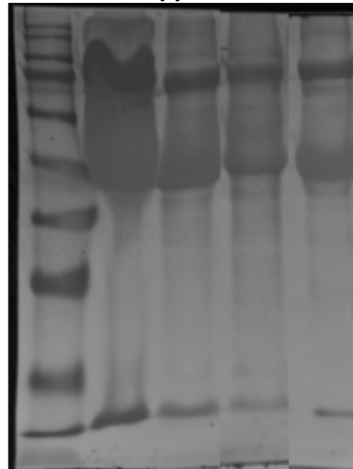

Blot: Vinculin

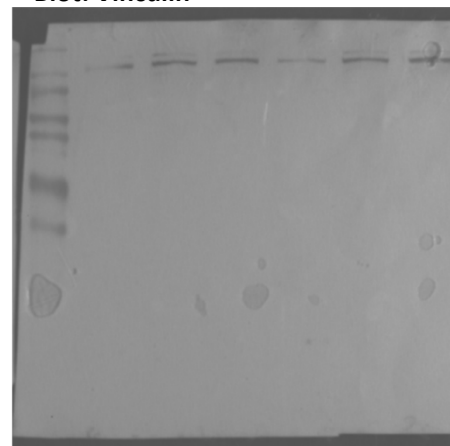

Blot: Vinculin

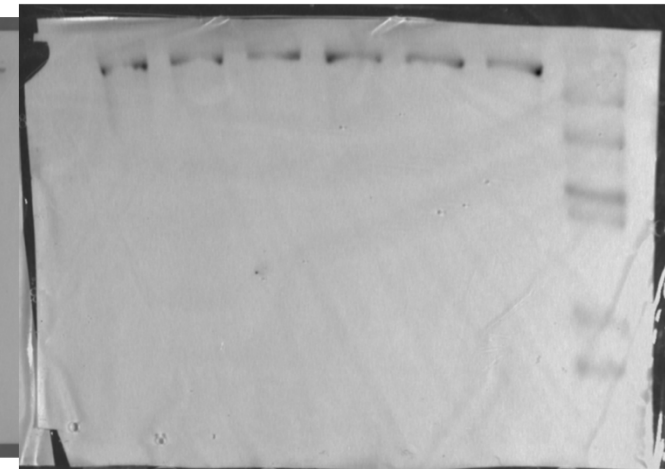

**Figure 4E**

Blot: GPR1

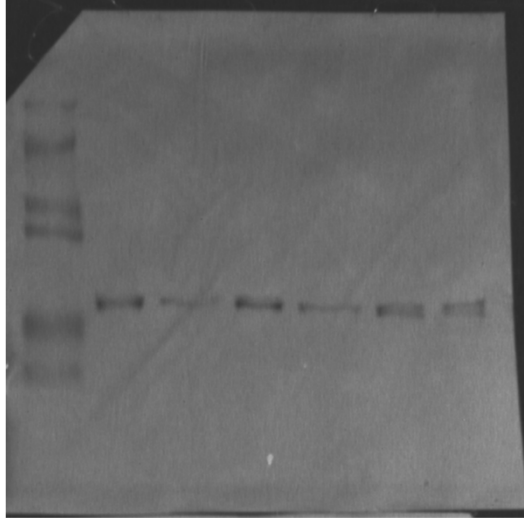

Blot: Vinculin

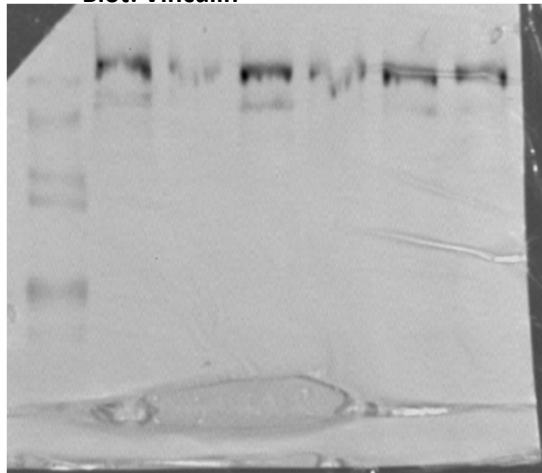

**Figure 4F**

Blot: CCRL2

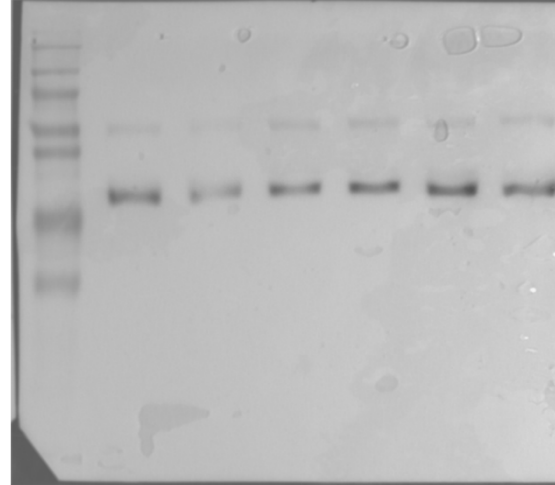

Blot: Vinculin

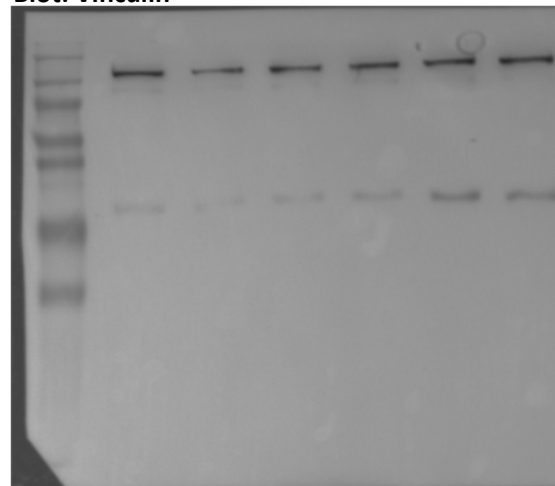

← Vinculin

**Figure 5A**

Blot: Chemerin

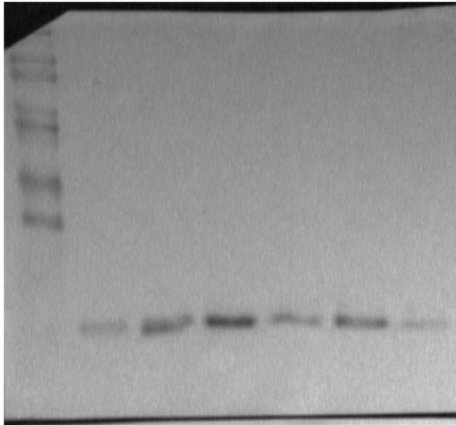

Blot: Vinculin

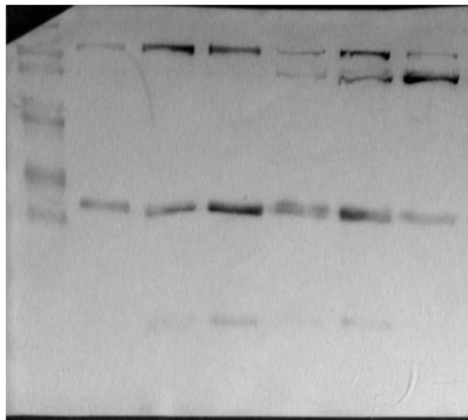

← Vinculin

**Figure 5B**

Blot: CMKLR1

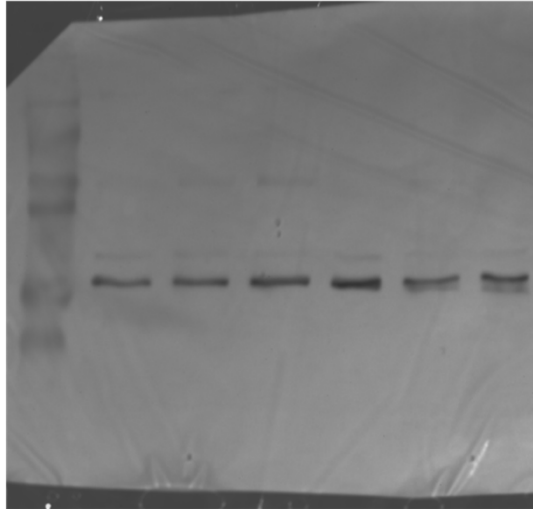

Blot: Vinculin

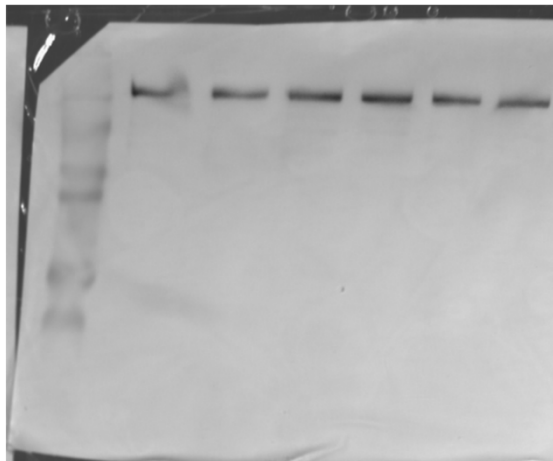

**Figure 5C**

Blot: GPR1

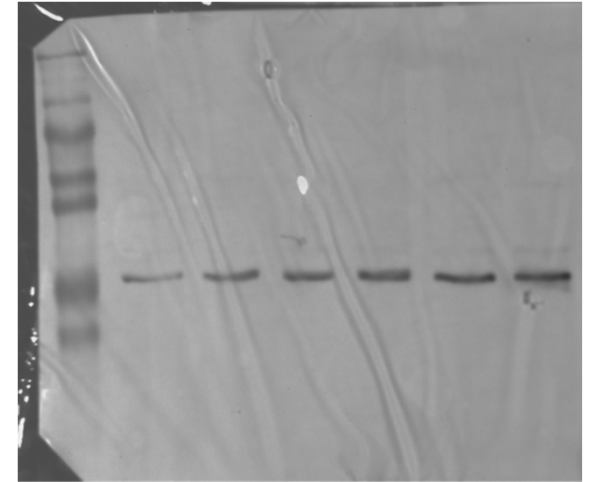

Blot: Vinculin

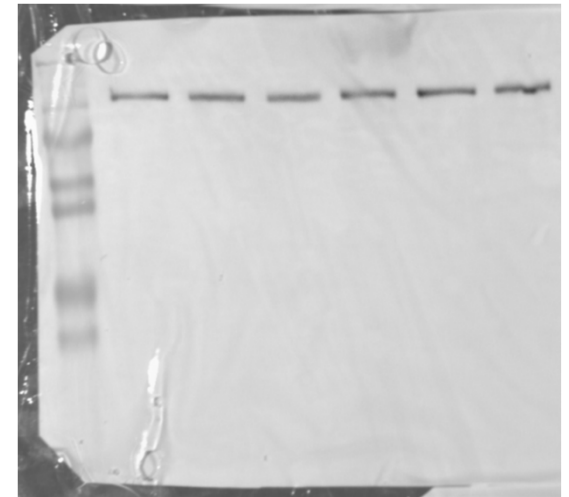

**Figure 5D**

**Blot: CCRL2**

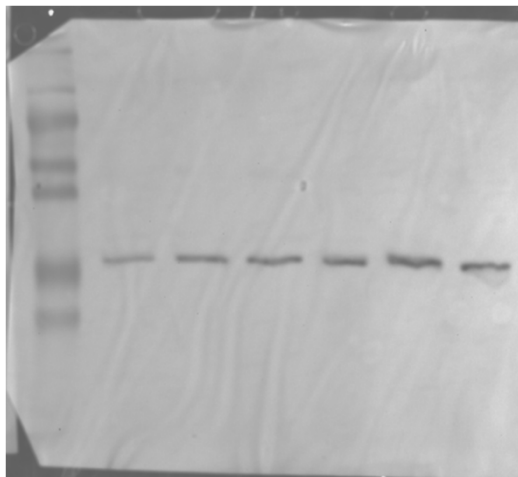

**Blot: Vinculin**

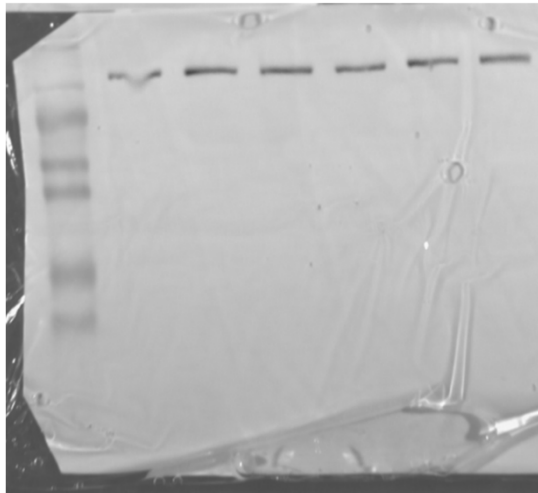

**Figure 5E**

**Blot: Chemerin**

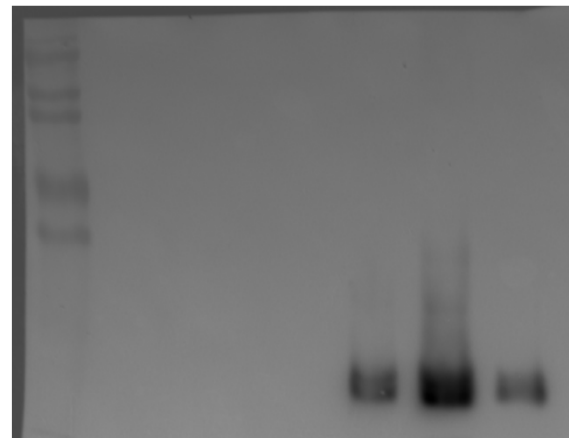

**Blot: Ponceau**

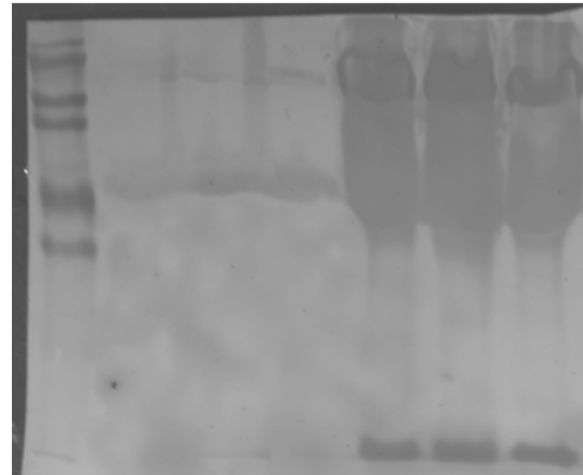

Supplement: 41598_2022_12961_MOESM1_ESM.pdf [file 41598_2022_12961_MOESM1_ESM.pdf]
